# Supplementary material
Source: publisher figshare collection journal article supplement (https://acs.figshare.com/ndownloader/files/5370674)
Supplement: Supplementary file 1 [file 5370674]

The electron delocalization range in atoms and on molecular surfaces

Benjamin G. Janesko, Kenneth B. Wiberg, Giovanni Scalmani, and Michael J. Frisch

Supporting Information

## SI-I. SUPPLEMENTARY FIGURES AND TABLES

TABLE SI-1: Lithium atom in various basis sets. Kinetic energy per electron KE/e (Hartree), atom-averaged delocalization  $D_A$  (bohr), radius  $r_{surf}$  of the 0.001 electrons/bohr<sup>-3</sup> density isosurface (bohr), and LOL( $r_{surf}$ ) (unitless) & surface delocalization  $D(r_{surf})$  (bohr).

| Basis       | KE/e  | $D_A$  | $r_{surf}$ | $10^2$ LOL( $r_{surf}$ ) | $D(r_{surf})$ |
|-------------|-------|--------|------------|--------------------------|---------------|
| STO-3G      | 2.476 | 3.0692 | 3.966      | 2.301                    | 5.606         |
| 3-21G       | 2.457 | 3.1011 | 4.062      | 3.336                    | 6.410         |
| 6-31G       | 2.484 | 3.1010 | 4.182      | 3.305                    | 6.163         |
| 6-31+G(d)   | 2.485 | 3.1021 | 4.159      | 3.227                    | 6.309         |
| 6-311+G(2d) | 2.477 | 3.1046 | 4.178      | 3.463                    | 6.346         |
| cc-pVTZ     | 2.478 | 3.1055 | 4.173      | 3.312                    | 6.320         |
| aug-cc-pVQZ | 2.478 | 3.1054 | 4.169      | 3.337                    | 6.334         |

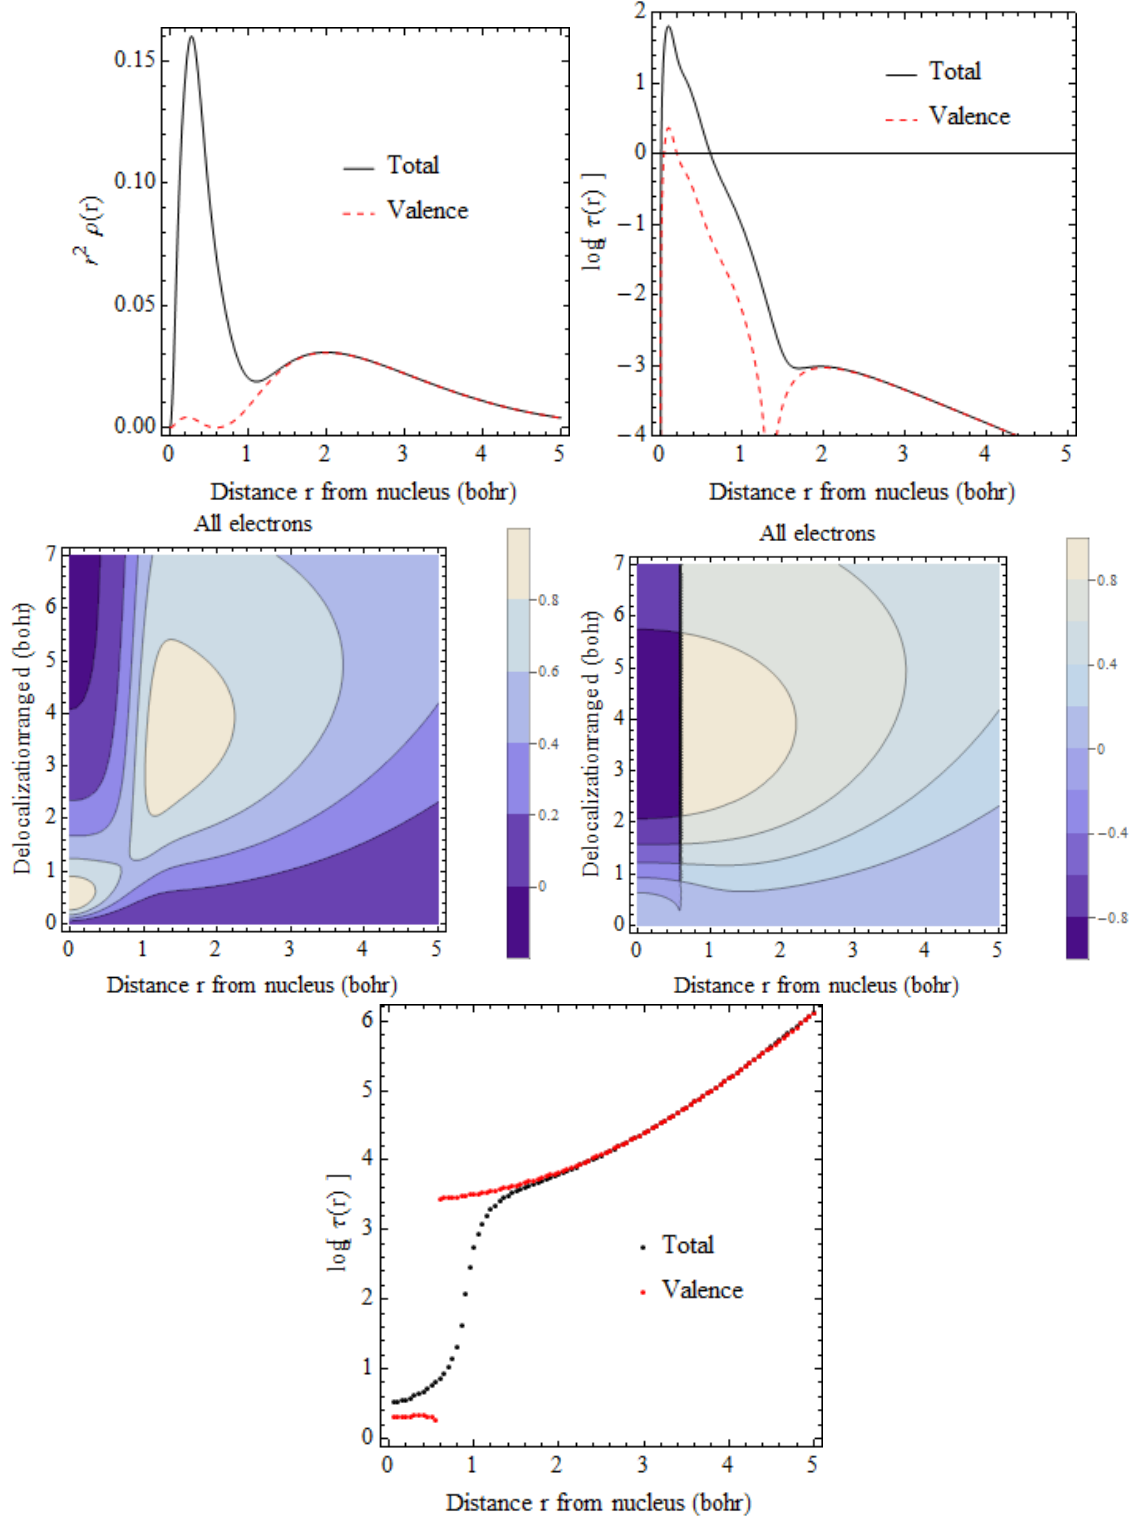

FIG. SI-1: Valence and all-electron calculations on isolated spherical Be atom, in the uncontracted 3-21G basis set. (Top left)  $r^2 \rho(r)$ . (Top right) Kinetic energy density  $\tau(r)$ , log scale. (Middle) Contour plots of  $\text{EDR}(r, d)$  for (left) all and (right) valence electrons. The EDR is negative near the nucleus due to core-valence orthogonality, which makes  $\gamma(\vec{r}, \vec{r}') < 0$  when points  $\vec{r}$  and  $\vec{r}'$  are in core and valence regions. (Bottom)  $D(r)$ . 2

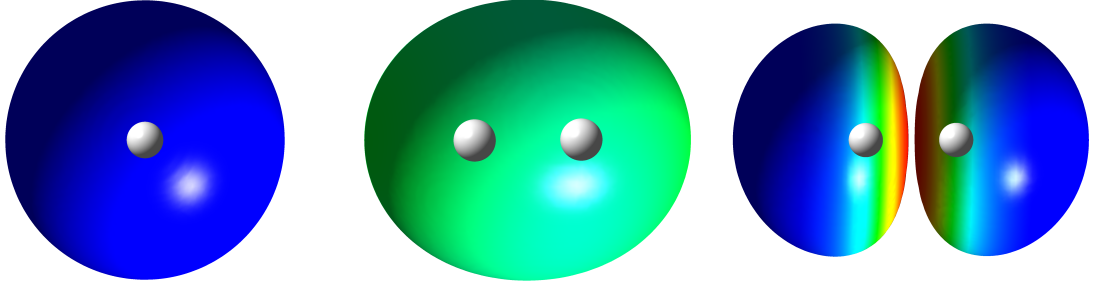

FIG. SI-2: Density isosurfaces from Figure 1, painted with the localized orbital locator  $\text{LOL}(\vec{r})$  from 0 (red) to 0.08 (blue). The LOL is near zero in this low-density region.

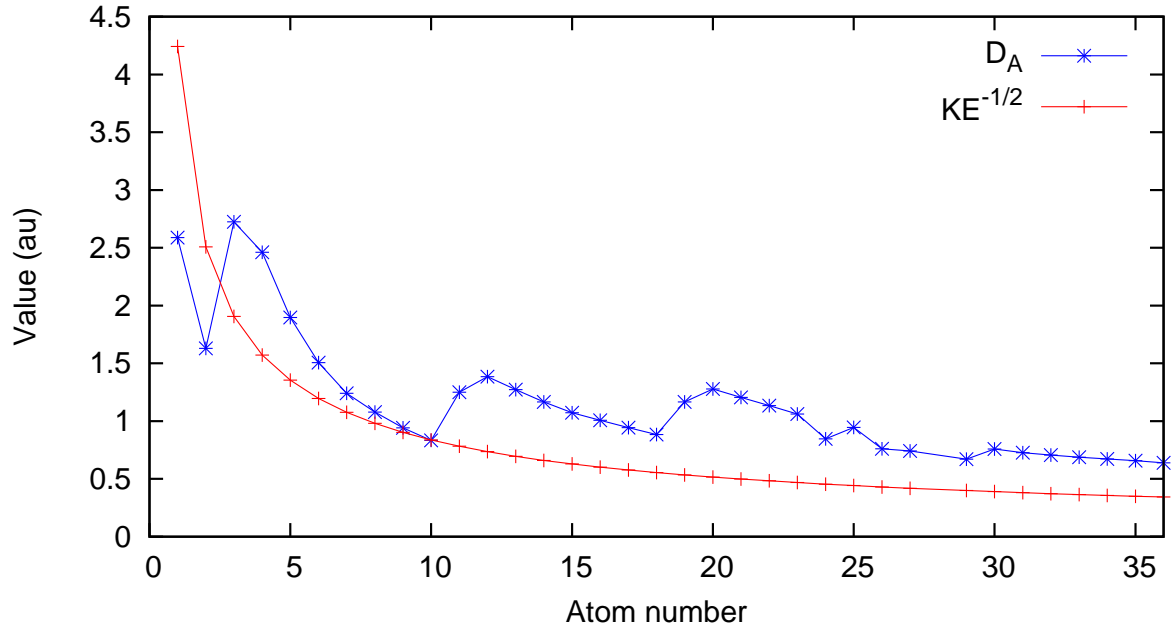

FIG. SI-3: Atomic delocalization lengths and  $KE^{-1/2}$  for the atoms in Figure 2, evaluated using full rather than valence density matrices.

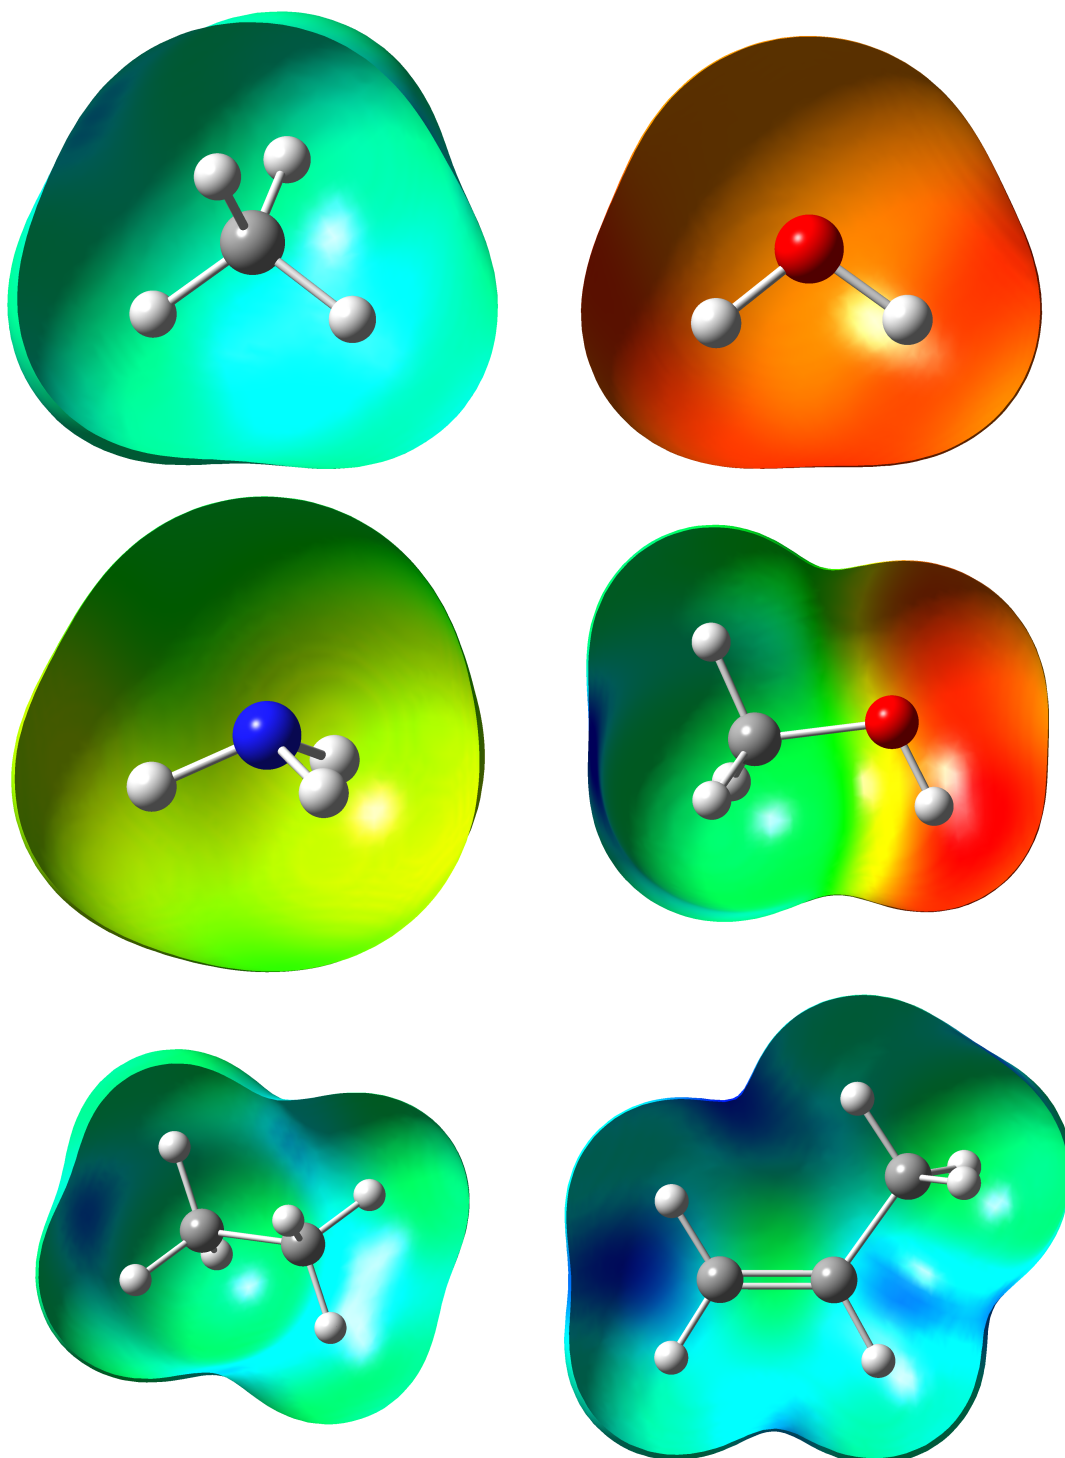

FIG. SI-4: Surface delocalization from B3LYP/6-31+G(d,p) calculations on small molecules. Reading left to right from top left :  $\text{CH}_4$ ,  $\text{H}_2\text{O}$ ,  $\text{NH}_3$ ,  $\text{CH}_3\text{OH}$ ,  $\text{C}_2\text{H}_6$ ,  $\text{C}_3\text{H}_6$ .  $D(\vec{r})$  plotted from 2.5 bohr (red) to 3.2 bohr (blue).



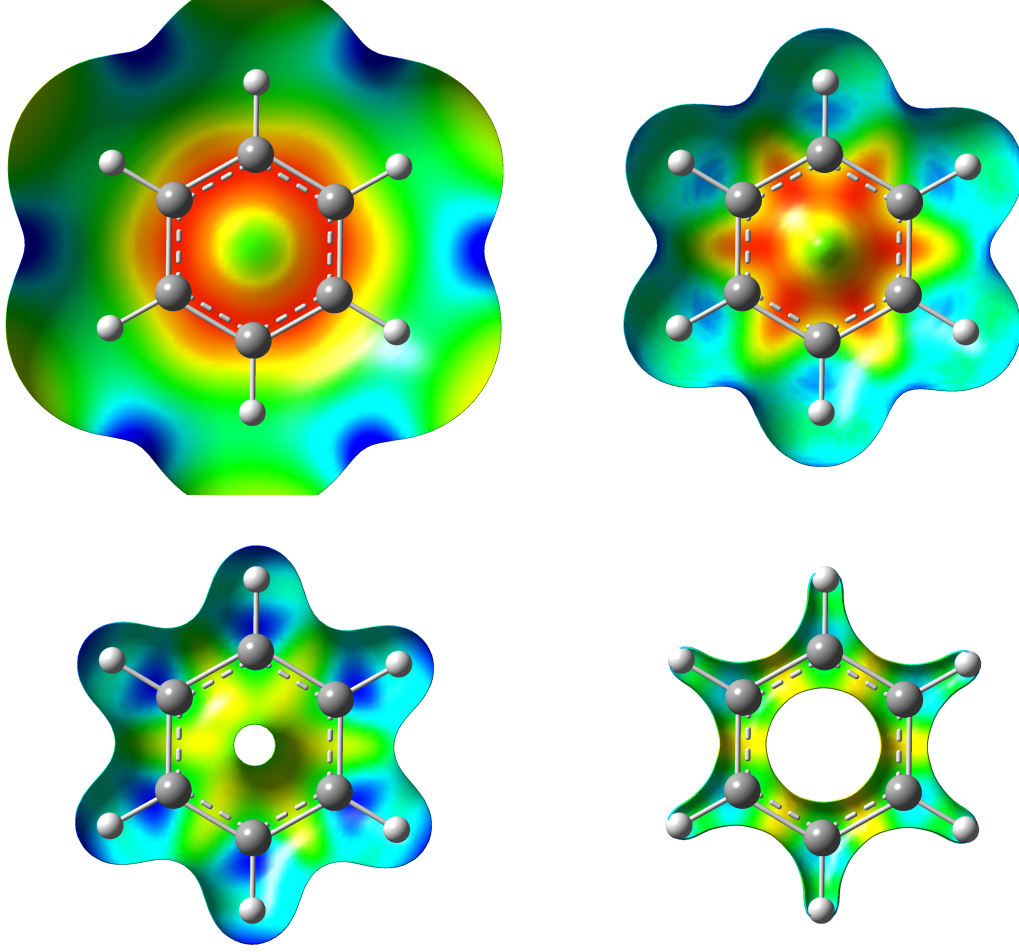

FIG. SI-5: Surface delocalization of Figure 5 plotted on different density isosurfaces. Top left:  $\rho = 0.0002 \text{ bohr}^{-3}$ ,  $D(\vec{r})$  from 3.4 bohr (red) to 3.7 bohr (blue). Top right:  $\rho = 0.005 \text{ bohr}^{-3}$ ,  $D(\vec{r})$  from 2.3 bohr (red) to 2.5 bohr (blue). Bottom left:  $\rho = 0.02 \text{ bohr}^{-3}$ ,  $D(\vec{r})$  from 1.8 bohr (red) to 2.1 bohr (blue). Bottom right:  $\rho = 0.1 \text{ bohr}^{-3}$ ,  $D(\vec{r})$  from 1.3 bohr (red) to 1.8 bohr (blue).

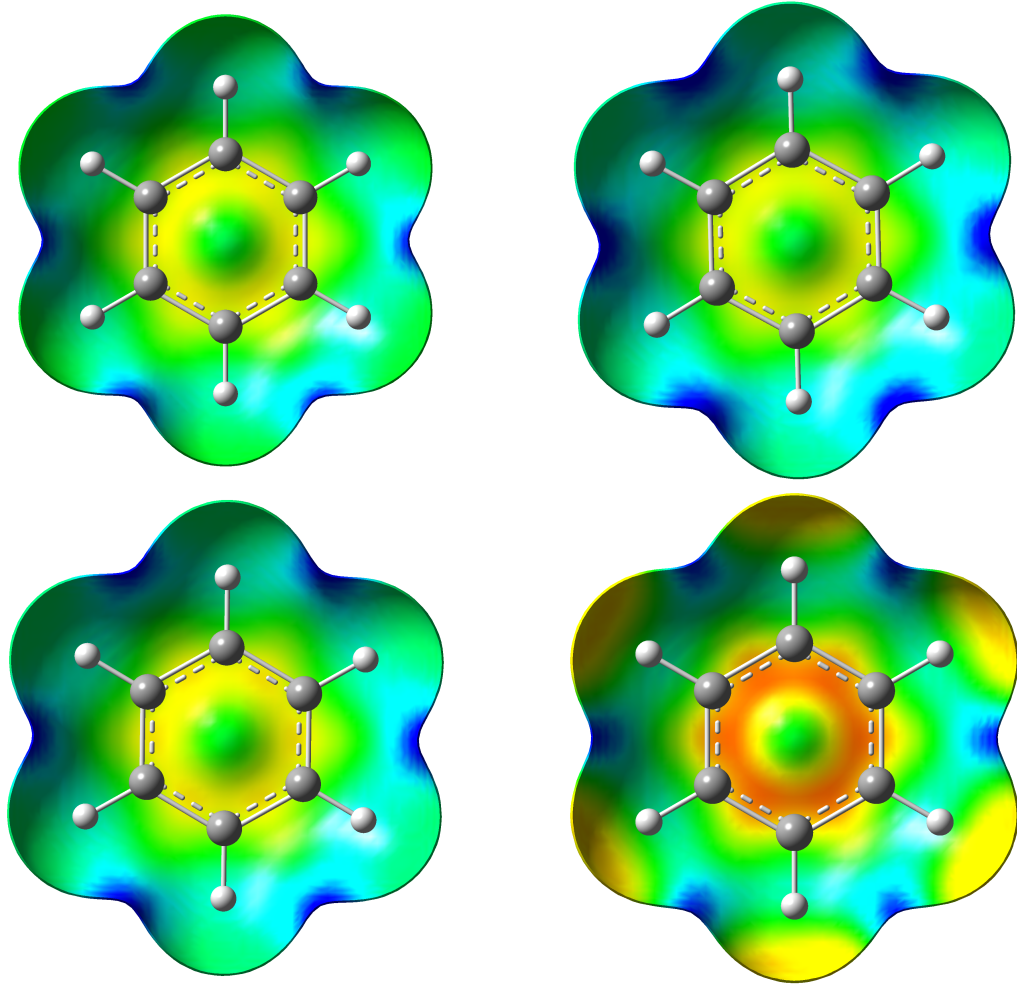

FIG. SI-6: Benzene surface delocalization of Figure 5, plotted on the  $\rho(\vec{r}) = 0.001$  electrons/bohr<sup>3</sup> density isosurface for different density matrices.  $D(\vec{r})$  from 2.8 bohr (red) to 3.1 bohr (blue). Top left: Hartree-Fock/6-311++G(2d,2p). Top right: LDA/6-311++G(2d,2p). Bottom left: B3LYP/6-311++G(2d,2p). Bottom right: Hartree-Fock/3-21G. Qualitative trends all match Figure 5.

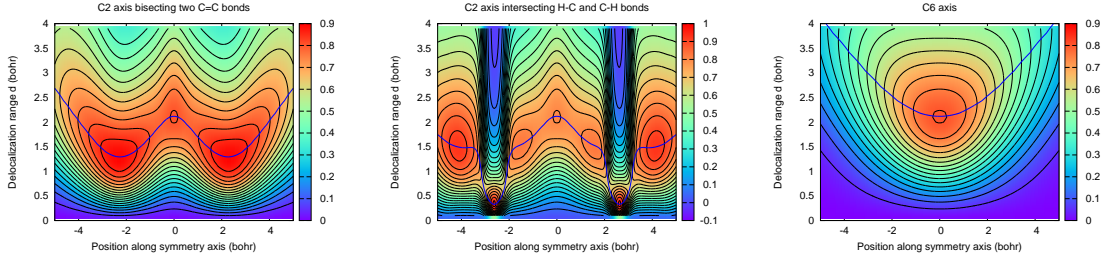

FIG. SI-7: Surface and contour plots of  $\text{EDR}(x; d)$  for points  $x$  along three of benzene's symmetry axes. Abscissa denotes position  $x$ , ordinate denotes length scale  $d$ , and surfaces are shaded from small/negative EDR in blue to EDR approaching 1 in red. Thick blue lines denote  $D(x)$  obtained from Eq. 4. Calculations use the geometry and CCSD density matrices of Figure 5.  $\text{EDR}(x; d)$  has a single maximum in  $d$  at each point  $x$ .  $D(x)$  is relatively long outside of the C=C bonds (i.e., between adjacent C-H bonds).

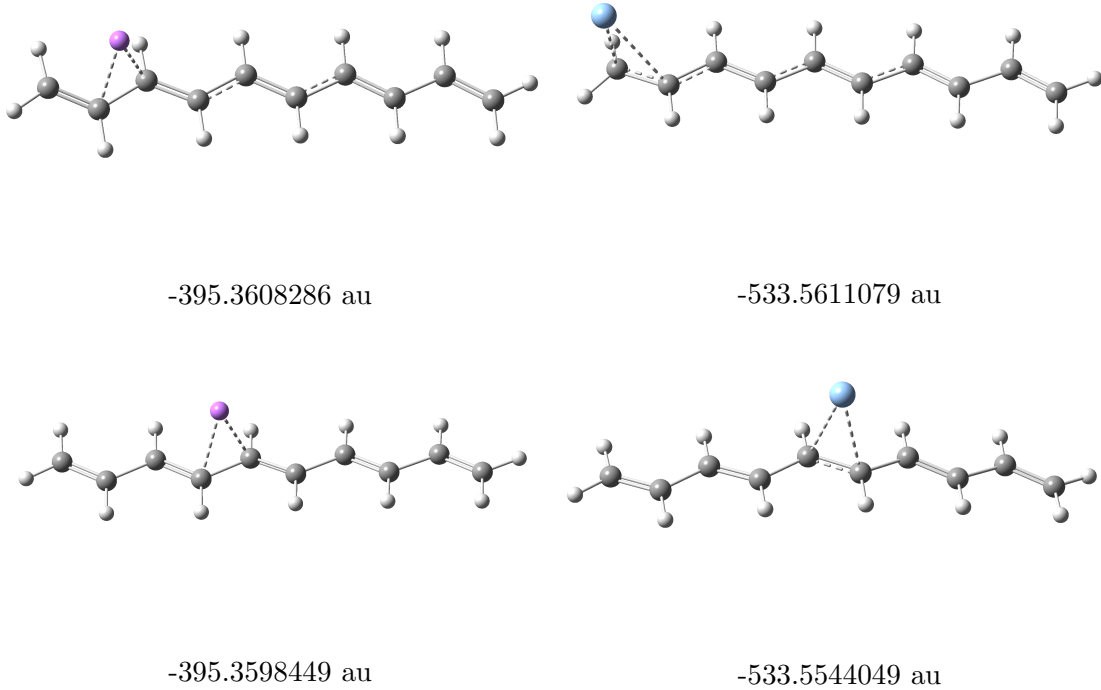

FIG. SI-8:  $\omega\text{B97X-D/LANL2DZ}$  geometries and total energies (au) for hard  $\text{Li}^+$  (left) and soft  $\text{Ag}^+$  (right) binding to 1,3,5,7,9-pentadecene. Soft  $\text{Ag}^+$  exhibits a greater preference for the larger surface delocalization of the terminal C=C bond (Figure 4), while hard  $\text{Li}^+$  has comparable preferences for both C-C bonds.

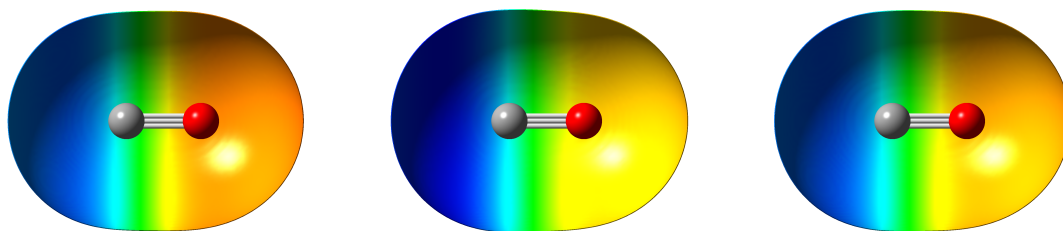

FIG. SI-9: Surface delocalization of carbon monoxide at equilibrium geometry. HF (left), LDA (middle), and CCSD (right) calculations, details as in Figure 6.

## SI-II. DELOCALIZATION AND KINETIC ENERGY FOR DIFFUSE DENSITIES

Here we show how an atom's kinetic energy and atomic delocalization vary as part of the density becomes delocalized. We consider a single electron shared between a tight and diffuse s-type Gaussian basis function,

$$\psi(\vec{r}) = C_a (\chi_{a=1}(\vec{r}) + \lambda \chi_a(\vec{r})) \quad (\text{SI-1})$$

$$\chi_a(\vec{r}) = \left( \frac{2}{\pi a^2} \right)^{3/4} \exp \left( -\frac{|\vec{r}|^2}{a^2} \right) \quad (\text{SI-2})$$

The diffuse basis function spans distance  $a$  (bohr), while the tight function has  $a = 1$  bohr. Parameter  $\lambda$  gives the fraction of electron density in the diffuse orbital. Figure SI-10 shows the spherically symmetric electron density at three values of  $a$  (at  $\lambda = 1$ ), illustrating how large  $a$  partitions the density into tight and diffuse regions. Figure SI-11 shows contour plots of  $\text{EDR}(r; d)$  at the same three  $a$  values. At large  $a$ ,  $\text{EDR}(r; d)$  has two local maxima in  $d$  for points  $r$  near the nucleus: a maximum at small  $d$  from the localized electrons, and a maximum at large  $d$  from the delocalized electrons. The characteristic delocalization length  $D(r)$  exhibits a discontinuity in the region where the more diffuse local maximum becomes dominant, illustrating a limitation of our focus on the global maximum.

Figure SI-12 compares the atom-averaged kinetic energy and delocalization length as functions of  $a$ . The kinetic energy initially decreases with  $a$ , but converges to an asymptotic value by  $a \sim 10$  bohr. However, the atom-averaged delocalization length increases substantially up to  $a \sim 20$  bohr, and decays rather slowly with further increases in  $a$ . This confirms that the atom-averaged delocalization length is relatively sensitive to small amounts of diffuse electron density.

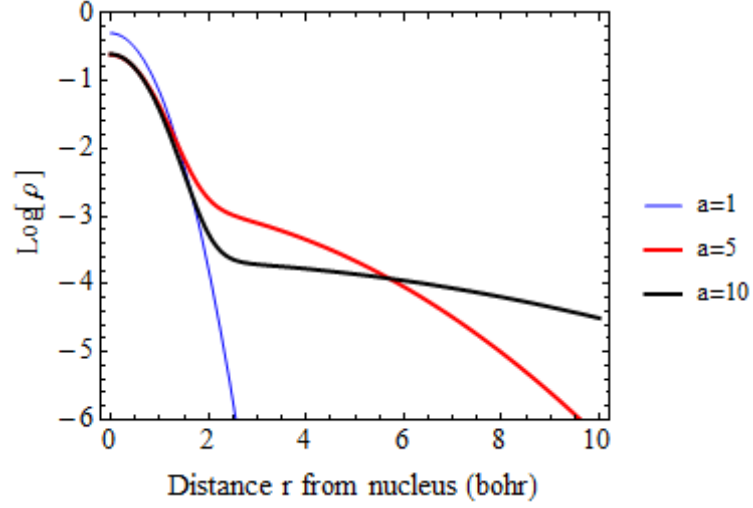

FIG. SI-10: Electron density  $\rho(\vec{r})$  from Eq. SI-1, vs. distance  $r$  from nucleus, at several values of the diffuse basis function's radius  $a$  and  $\lambda = 1$ .

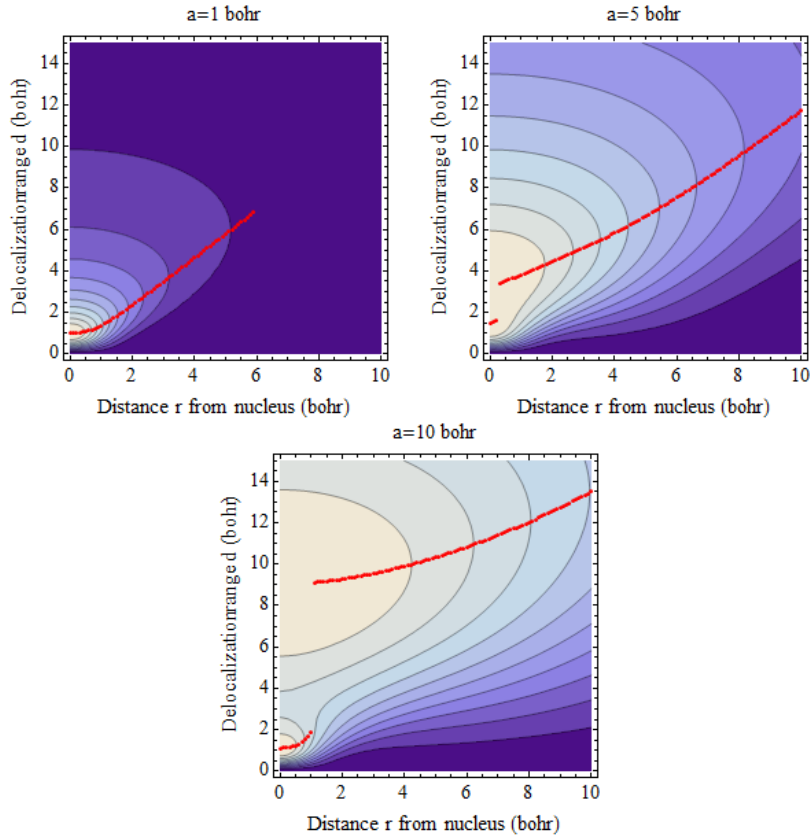

FIG. SI-11: Contour plots of  $EDR(r; d)$  from Eq. SI-1, plotted vs. distance  $r$  from nucleus and delocalization length  $d$ , at several values of the diffuse basis function's radius  $a$  and  $\lambda = 1$ . Red lines denote  $D(r)$ .

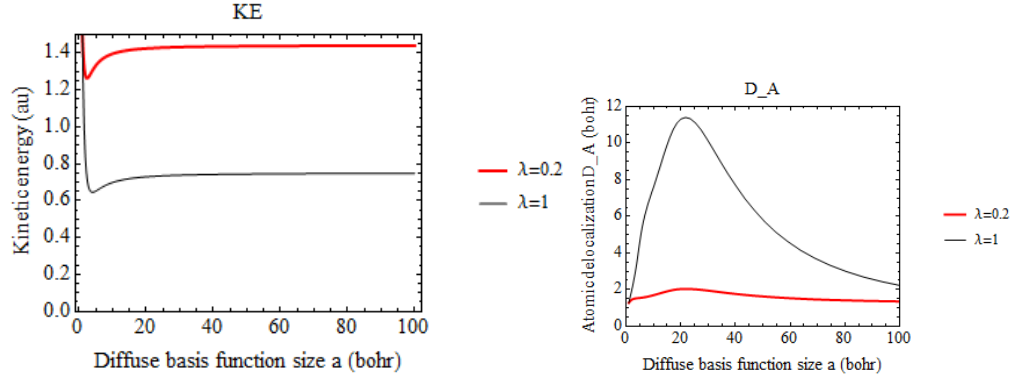

FIG. SI-12: Kinetic energy and atomic delocalization length  $D_A$  from Eq. SI-1, plotted vs. delocalized basis function size  $a$ . Results at two values of  $\lambda$ .
